# Supplementary material for: Potential Immunohistochemical Biomarkers for Grading Oral Dysplasia: A Literature Review
Source: MDPI journal article supplement (doi:10.3390/biomedicines12030577), 2024-03-05
Supplement: s1 [file s1]

**Table S1.** Detailed summary of potential immunohistochemical biomarkers for assessing grading of oral dysplasia with a brief description of the sample characteristics and the study setting.

| Study                     | Setting  | Sample characteristics                                                                                                                                                                                                               | Potential biomarker                    |
|---------------------------|----------|--------------------------------------------------------------------------------------------------------------------------------------------------------------------------------------------------------------------------------------|----------------------------------------|
| Abidullah et al., 2019    | India    | OED (n=45): mild (n=15), moderate (n=15), severe (n=15); normal (n=10)                                                                                                                                                               | MUC4                                   |
| Alam et al., 2022         | India    | OD (n=20): mild (n=10), moderate (n=8), severe (n=2); OPMD (n=20); OSCC (n=20); normal (n=20)                                                                                                                                        | paxillin                               |
| Aravind et al. 2017       | India    | OD (n=10): mild (n=3), moderate (n=3), severe (n=4); OSCC (n=30); hyperplasia (n=10); normal (n=10)                                                                                                                                  | OPN                                    |
| Barros et al., 2022       | Brazil   | OED: mild (n=14), moderate (n=10), severe (n=3), without dysplasia (n=17)                                                                                                                                                            | 8-OHdG, Ref-1, XRCC-1                  |
| Batool et al., 2020       | Pakistan | OD (n=60): mild (n=20), moderate (n=21), severe (n=19); normal (n=60)                                                                                                                                                                | CK5\6                                  |
| Bavle et al., 2021        | India    | OD (n=19): mild (n=15), moderate (n=3), severe (n=1); simple hyperplasia (n=2)                                                                                                                                                       | p63, CD31                              |
| Chandolia et al., 2017    | India    | OED (n=60): mild (n=20), moderate (n=20), severe (n=20); OSCC (n=30); normal (n=10)                                                                                                                                                  | N-cadherin                             |
| Chowdhury et al., 2021    | India    | OED (n=20): mild (n=10), moderate (n=5), severe (n=5); OSMF (n=10); normal (n=10)                                                                                                                                                    | $\beta$ -catenin                       |
| Dash et al., 2020         | India    | OED (n=45): mild (n=15), moderate (n=15), severe (n=15); OSCC (n=45); normal (n=15)                                                                                                                                                  | Ki-67                                  |
| de Vicente et al., 2019   | Spain    | OED (n=55): low grade (n=42), high grade (n=13); OSCC (n=125)                                                                                                                                                                        | NANOG                                  |
| Debta et al., 2020        | India    | OSMF (n=7): no dysplasia (n=3), mild (n=2), moderate (n=2); OL (n=11): no dysplasia (n=4), mild (n=5), moderate (n=2); erythroplakia (n=2): moderate (n=2); OLP (n=7): no dysplasia (n=4), mild (n=2), moderate (n=1); normal (n=10) | GLUT-1                                 |
| Desai et al., 2017        | India    | OED (n=60): mild (n=20), moderate (n=20), severe (n=20); OSCC (n=30); normal (n=10)                                                                                                                                                  | PDCD4                                  |
| Fakurnejad et al., 2019   | USA      | OD (n=101): low-grade (n=53), high-grade (n=48); malignant regions (n=50); normal (n=68)                                                                                                                                             | EGFR                                   |
| Gadbail et al., 2018      | India    | OSMF (n=50): low-risk (n=28), high-risk (n=22); normal (n=30)                                                                                                                                                                        | Ki-67, CD105, $\alpha$ -SMA antibodies |
| Gadbail et al., 2017      | India    | OPMD (n=140): OED (n=115): mild (n=44), moderate (n=43), severe (n=28); hyperkeratosis/atrophic (n=25); normal (n=30)                                                                                                                | Ki-67, CD105, $\alpha$ -SMA antigen    |
| Grubelnik et al., 2020    | Slovenia | OD: low-grade (n=36), high-grade (n=36); OSCC (n=30); normal (n=15)                                                                                                                                                                  | NANOG                                  |
| Gupta et al., 2017        | India    | OED (n=30): mild (n=10), moderate (n=10), severe (n=10); normal (n=10)                                                                                                                                                               | VEGF, CD34                             |
| Imaizumi et al., 2021     | Japan    | OED: mild (n=62), moderate (n=23), severe (n=12); OSCC (n=61)                                                                                                                                                                        | 53BP1, Ki-67                           |
| Kamala et al., 2022       | India    | OSMF (n=35): no dysplasia (n=14), OED (n=21): mild (n=4), moderate (n=4), severe (n=13); OSCC (n=10); normal (n=10)                                                                                                                  | Ki-67                                  |
| Karri et al., 2020        | India    | OED (n=30): mild (n=10), moderate (n=10), severe (n=10); OSCC (n=10); normal (n=10)                                                                                                                                                  | HSP27                                  |
| Karunagaran et. al., 2019 | India    | OSMF (n=30): mild (n=10), moderate (n=10), severe (n=10); normal (n=10)                                                                                                                                                              | PDPN                                   |
| Kawai et al., 2021        | Japan;   | OED (n=60): low-grade (n=30), high-grade (n=30); OSCC (n=30); normal (n = 10)                                                                                                                                                        | MIA, MIA2                              |

|                        |                |                                                                                                              |                                               |
|------------------------|----------------|--------------------------------------------------------------------------------------------------------------|-----------------------------------------------|
| Kujan et al., 2022     | Australia      | OED (n=53): low-grade (n=24), high-grade (n=29); OSCC (n=14); non-dysplastic (n=34)                          | FOXP3, TGF-beta, IL-6, IL-10                  |
| Leung et al., 2017     | United Kingdom | OED (n=73): mild (n=24), moderate (n=17), severe (n=32); OSCC (n=13); normal (n=24)                          | Ki-67, CD1, H2AX, p53 and p16, H3K9me3        |
| Lunawat et al., 2021   | India          | OED (n=30): mild (n=15), moderate (n=9), severe (n=6); normal (n=30)                                         | PDPN                                          |
| Miguel et al., 2021    | Brazil         | OED (n=66): low-risk (n=42), high-risk (n=24); OSCC (n=27); non-neoplastic (n=28)                            | MMP-9, TIMP-1, VIM                            |
| Mondal et al., 2020    | India          | OL (n=140): OED (n=126): mild (n=64), moderate (n=43), severe (n=29); definite malignancies (n=14)           | Ki-67                                         |
| Monteiro et al., 2021  | Portugal       | OL-OED (n=52): low-grade (n=41), high-grade (n=11); normal (n=12)                                            | BubR1, Mad2, Bub3, Spindly                    |
| Monteiro et al., 2022  | Portugal       | OL-OED (n=52): low-grade (n=41), high-grade (n=11); normal (n=12)                                            | CD44v6, CD147, EGFR, p53, p63, p73, p16, PDPN |
| Nguyen et al. 2017     | Japan          | OL-OED (n=93): mild (n=11), moderate (n=78), severe (n=4); OSCC (n=99)                                       | LAMC2                                         |
| Ono et al., 2019       | Japan          | OED (n=100): low-grade (n=50), high-grade (n=50); CIS (n=50); OSCC (n=80); hyperplasia (n=20); normal (n=20) | YAP, Np63                                     |
| Pallavi et al., 2018   | India          | OED (n=30): mild (n=10), moderate (n=10), severe (n=10); OSCC (n=30); normal (n=10)                          | Bcl-2, c-Myc                                  |
| Pandya et al., 2018    | India          | OED (n=24); OSCC (n=28)                                                                                      | p53, CDKN1A                                   |
| Patel et al., 2017     | India          | OL-OED (n=30): mild (n=8), moderate (n=9), severe (n=13); OSCC (n=30)                                        | cycD1, p63                                    |
| Patel et al., 2019     | India          | OED (n=30): mild (n=13), moderate (n=11), severe (n=6); OSCC (n=30)                                          | HIF-1a                                        |
| Pathak et al., 2022    | India          | OED (n=24): mild (n=8), moderate (n=8), severe (n=8); OSCC (n=24)                                            | Bcl-2                                         |
| Patil et al., 2022     | India          | OED (n=30): mild (n=10), moderate (n=10), severe (n=10); normal (n=10)                                       | p53                                           |
| Patlolla et al., 2020  | India          | OED (n=30): low-risk (n=15), high-risk (n=15); OSCC (n=45); normal (n=15)                                    | GLUT-1                                        |
| Prgomet et al., 2017   | Sweden         | OD (n=21): mild (n=5), moderate (n=8), severe (n=8)                                                          | WNT5A, E-cadherin, $\beta$ -catenin           |
| Puneeta et al., 2022   | India          | OED (n=60): mild (n=20), moderate (n=20), severe (n=20); OSCC (n=60); normal (n=5)                           | E-cadherin, VIM                               |
| Qahtani et al., 2020   | Saudi Arabia   | OED (n=15): mild (n=6), moderate (n=4), severe (n=5); OSCC (n=20)                                            | TWIST                                         |
| Rajeswari et al., 2020 | India          | OED (n=30): mild (n=10), moderate (n=10), severe (n=10); OSCC (n=10); hyperplasia (n=10); normal (n=10)      | CK19                                          |
| Santosh et al., 2019   | USA            | OED (n=50): low-grade (n=25), high-grade (n=25); OSCC (n=25); normal (n=25)                                  | cornulin                                      |
| Sawada et al., 2022    | Japan          | OED (n=40): mild (n=21), moderate (n=13), severe (n=6)                                                       | p53                                           |
| Sharada et al., 2021   | India          | OED (n=30): mild (n=10), moderate (n=10), severe (n=10); OSMF (n=10); OSCC (n=10); normal (n=10)             | COX-2                                         |
| Sharada et al., 2018   | India          | OED (n=30): mild (n=10), moderate (n=10), severe (n=10); OSMF (n=10); OSCC (n=10); normal (n=10)             | E-cadherin, VEGF                              |
| Sharma et al., 2022    | India          | OED (n=20); OSCC (n=20); normal (n=20)                                                                       | E-cadherin                                    |
| Singh et al., 2020     | India          | OL-OED (n=30): mild (n=9), moderate (n=10), severe (n=11); OSCC (n=30); normal (n=30)                        | iNOS                                          |
| Suwasini et al., 2018  | India          | OL-OED (n=15): mild (n=5), moderate (n=5), severe (n=5); normal (n=5)                                        | p53, Ki-67                                    |
| Swain et al., 2022     | India          | OED (n=30): mild (n=10), moderate (n=10), severe (n=10); OSCC (n=30); normal (n=10)                          | Ki-67, MCM2                                   |

|                                  |          |                                                                                                       |               |
|----------------------------------|----------|-------------------------------------------------------------------------------------------------------|---------------|
| Takkem et al., 2018              | Syria    | OED (n=30): mild (n=10), moderate (n=10), severe (n=10); OSCC (n=30); normal (n=10)                   | Ki-67         |
| Udompatanakorn&Taebunpakul, 2022 | Thailand | OED (n=20): low-grade (n=10), high-grade (n=10); OSCC (n=20); normal (n=20)                           | METTL3        |
| Vadla et al., 2022               | India    | OL-OED (n=30): mild (n=16), moderate (n=10), severe (n=4); OSCC (n=30); normal (n=30)                 | stathmin      |
| Vageli et al., 2022              | Greece   | actinic cheilitis (n=34): low-grade ED (n=31), high-grade ED (n=3); LSCC (n=12)                       | laminin       |
| Venkat Naga et al., 2019         | India    | OED (n=30): mild (n=10), moderate (n=10), severe (n=10); normal (n=10)                                | CD44 antibody |
| Wang et al., 2022                | Taiwan   | OPMD-OED (n=33): mild (n=19), moderate-severe (n=14); OSCC (n=66); normal (n=14)                      | Orai1, STIM1  |
| Zakaria et al., 2018             | Egypt    | OED (n=30): mild (n=10), moderate (n=10), severe (n=10); early invasive OSCC (n=5); hyperplasia (n=5) | MCM2          |

Legend: 53BP1, P53-binding protein 1; 8-OHdG, 8-hydroxy-2-deoxyguanosine;  $\alpha$ -SMA,  $\alpha$ -smooth muscle actin; Bcl-2, B-cell lymphoma 2; BUBR1, budding uninhibited by benzimidazole-related 1; CD, cluster differentiation; CDKN1A, cyclin dependent kinase inhibitor 1A; CK, cytokeratin; COX-2, cyclooxygenase 2; CycD1, cyclin D1; ED, epithelial dysplasia; EGFR, epidermal growth factor receptor; FOXP3, forkhead box P3; GLUT-1, glucose transporter-1; H2AX, H2A histone family member X; H3K9me3, trimethylhistone H3 (Lys9); HIF, hypoxia-inducible factor; HSP, heat shock protein; IL, interleukin; iNOS, inducible nitric oxide synthase; LAMC2, laminin subunit gamma 2; LSCC, lip squamous cell carcinoma; Mad2, mitotic arrest deficient 2; MCM2, minichromosome maintenance complex component 2; METTL3, methyltransferase-like 3; MMP-9, matrix metalloproteinase 9; MIA, melanoma inhibitory activity; MUC, mucin; OD, oral dysplasia; OED, oral epithelial dysplasia; OL, oral leukoplakia; OLP, oral lichen planus; OPMD, oral potentially malignant disorder; OPN, osteopontin; OSCC, oral squamous cell carcinoma; OSMF, oral submucous fibrosis; PDCD4, programmed cell death 4; PDPN, podoplanin; Ref-1, Redox factor-1; STIM1, stromal interaction molecule 1; TGF, transforming growth factor; TIMP-1, tissue inhibitor of metalloproteinase-1; VEGF, vascular endothelial growth factor; VIM, vimentin; XRCC-1, X-ray Repair Cross Complementing-1; YAP, Yes-associated protein
